# Supplementary material for: Experience of Autistic Children and Their Families During the Pandemic: From Distress to Coping Strategies
Source: Springer Nature journal article supplement (doi:10.1007/s10803-021-05233-z), 2021-08-27
Supplement: MOESM1 [file 19607150]

Supplementary Material

**Table 1**

*Associations Between Being Concerned About the Child's Development, Child's behaviors Are Easy to Manage on a Daily Basis and Stress Level*

|   | 1              | 2              | 3              | 4              | 5             | 6             | 7              | 8 |
|---|----------------|----------------|----------------|----------------|---------------|---------------|----------------|---|
| 1 | -              |                |                |                |               |               |                |   |
| 2 | <b>-.503**</b> | -              |                |                |               |               |                |   |
| 3 | <b>.313**</b>  | <b>-.297**</b> | -              |                |               |               |                |   |
| 4 | -.171          | .145           | <b>-.394**</b> | -              |               |               |                |   |
| 5 | <b>.251**</b>  | <b>-.215*</b>  | <b>.544**</b>  | <b>-.333**</b> | -             |               |                |   |
| 6 | <b>.379**</b>  | <b>-.392**</b> | <b>.690**</b>  | <b>-.325**</b> | <b>.773**</b> | -             |                |   |
| 7 | -.051          | .083           | -.081          | .141           | -.110         | -.131         | -              |   |
| 8 | <b>.225*</b>   | -.183          | <b>.271**</b>  | <b>-.301**</b> | <b>.346**</b> | <b>.408**</b> | <b>-.332**</b> | - |

\* $p < .05$  \*\* $p < .01$ .

1. I am concerned about my child's development.
2. My child's behaviors are easy to manage on a daily basis.
3. I consider the pandemic period to be a great source of stress for my child.
4. I see the pandemic period as an opportunity to enjoy quality time with entourage.
5. I consider the pandemic period to be a great source of stress for me.
6. I consider the pandemic period to be a great source of stress for our family.
7. Over time, the situation becomes less stressful (for me, my family, my child).
8. Over time, the situation becomes more stressful (for me, my family, my child).

*Note.* This table demonstrates the associations between concerned about the child's development, ease of managing behaviors and stress level (n=109)

**Table 2**

*Associations Between Being Concerned About the Child's Development, Child's Behaviors Are Easy to Manage on a Daily Basis and Sociodemographic and Clinical Characteristics*

|   | 1              | 2              | 3             | 4             | 5             | 6      | 7      | 8            | 9 |
|---|----------------|----------------|---------------|---------------|---------------|--------|--------|--------------|---|
| 1 | -              |                |               |               |               |        |        |              |   |
| 2 | <b>,534**</b>  | -              |               |               |               |        |        |              |   |
| 3 | <b>-,322**</b> | <b>-,318**</b> | -             |               |               |        |        |              |   |
| 4 | <b>-,338**</b> | <b>-,503**</b> | <b>,519**</b> | -             |               |        |        |              |   |
| 5 | -0,113         | -0,041         | <b>,192*</b>  | 0,137         | -             |        |        |              |   |
| 6 | -0,017         | 0,150          | 0,071         | -0,007        | 0,015         | -      |        |              |   |
| 7 | -0,084         | <b>-,216*</b>  | 0,033         | 0,102         | 0,116         | 0,018  | -      |              |   |
| 8 | -0,112         | -0,132         | 0,185         | <b>,273**</b> | <b>,227*</b>  | -0,060 | 0,122  | -            |   |
| 9 | -0,018         | 0,057          | -0,092        | -0,042        | <b>,253**</b> | -0,032 | -0,073 | <b>,192*</b> | - |

\* $p < .05$  \*\* $p < .01$ .

1. I was concerned about my child's development.
2. I am concerned about my child's development.
3. My child's behaviors were easy to manage on a daily basis.
4. My child's behaviors are easy to manage on a daily basis.
5. Age of child.
6. Number of siblings.
7. Family income.
8. Level of education (parent 1).
9. Level of education (parent 2).

*Note.* This table demonstrates the associations between concerned about the child's development, ease of managing behaviors and sociodemographic and clinical characteristics (n=109).

**Table 3***Associations Between Being Concerned About the Child's Development, Child's Behaviors Are Easy to Manage on a Daily Basis and Facilitating Factors (part 1)*

|    | 1              | 2              | 3              | 4              | 5             | 6             | 7             | 8             | 9             | 10            | 11            | 12             | 13            | 14            | 15           | 16            | 17           | 18    | 19    | 20 |
|----|----------------|----------------|----------------|----------------|---------------|---------------|---------------|---------------|---------------|---------------|---------------|----------------|---------------|---------------|--------------|---------------|--------------|-------|-------|----|
| 1  | -              |                |                |                |               |               |               |               |               |               |               |                |               |               |              |               |              |       |       |    |
| 2  | <b>.534**</b>  | -              |                |                |               |               |               |               |               |               |               |                |               |               |              |               |              |       |       |    |
| 3  | <b>-.322**</b> | <b>-.318**</b> | -              |                |               |               |               |               |               |               |               |                |               |               |              |               |              |       |       |    |
| 4  | <b>-.338**</b> | <b>-.503**</b> | <b>.519**</b>  | -              |               |               |               |               |               |               |               |                |               |               |              |               |              |       |       |    |
| 5  | .024           | .179           | -.057          | -.081          | -             |               |               |               |               |               |               |                |               |               |              |               |              |       |       |    |
| 6  | .046           | .110           | -.105          | -.095          | <b>.288**</b> | -             |               |               |               |               |               |                |               |               |              |               |              |       |       |    |
| 7  | -.061          | -.078          | .019           | -.018          | <b>.317**</b> | <b>.247**</b> | -             |               |               |               |               |                |               |               |              |               |              |       |       |    |
| 8  | <b>.389**</b>  | <b>.266**</b>  | <b>-.194*</b>  | -.176          | .084          | .081          | .108          | -             |               |               |               |                |               |               |              |               |              |       |       |    |
| 9  | <b>.194*</b>   | <b>.285**</b>  | -.152          | <b>-.318**</b> | .129          | <b>.254**</b> | .135          | <b>.316**</b> | -             |               |               |                |               |               |              |               |              |       |       |    |
| 10 | .172           | <b>.211*</b>   | <b>-.463**</b> | <b>-.523**</b> | -.018         | .034          | .002          | <b>.216*</b>  | .244*         | -             |               |                |               |               |              |               |              |       |       |    |
| 11 | .111           | .024           | -.121          | -.043          | .072          | <b>.273**</b> | .083          | .016          | .024          | .091          | -             |                |               |               |              |               |              |       |       |    |
| 12 | <b>.239*</b>   | <b>.250**</b>  | <b>-.367**</b> | <b>-.386**</b> | .094          | <b>.219*</b>  | .134          | .173          | <b>.358**</b> | <b>.270**</b> | <b>.291**</b> | -              |               |               |              |               |              |       |       |    |
| 13 | .055           | .104           | -.143          | -.002          | .006          | .175          | .069          | .048          | .069          | .136          | .161          | .113           | -             |               |              |               |              |       |       |    |
| 14 | -.047          | -.115          | .097           | .056           | .046          | -.115         | .124          | .063          | .048          | -.089         | -.168         | .110           | -.047         | -             |              |               |              |       |       |    |
| 15 | -.032          | -.022          | -.134          | -.005          | -.023         | .003          | <b>.308**</b> | .072          | .025          | .109          | .127          | .037           | -.067         | .101          | -            |               |              |       |       |    |
| 16 | <b>-.301**</b> | <b>-.220*</b>  | .163           | .133           | .034          | .016          | .043          | .146          | .001          | -.042         | -.133         | <b>-.281**</b> | <b>-.192*</b> | <b>.287**</b> | .063         | -             |              |       |       |    |
| 17 | -.074          | -.086          | .102           | .109           | .101          | .083          | .016          | -.004         | .071          | -.058         | .132          | -.017          | -.181         | .183          | .056         | <b>.226*</b>  | -            |       |       |    |
| 18 | .046           | -.098          | <b>-.213*</b>  | -.017          | .141          | .018          | .104          | .081          | .095          | .160          | -.090         | -.091          | -.094         | .174          | .160         | <b>.254**</b> | -.037        | -     |       |    |
| 19 | -.001          | -.072          | -.105          | .009           | <b>.239*</b>  | .100          | <b>.247**</b> | .169          | .016          | .076          | .031          | -.052          | -.161         | .174          | <b>.200*</b> | <b>.214*</b>  | <b>.203*</b> | .182  | -     |    |
| 20 | -.078          | -.035          | -.076          | .036           | -.082         | <b>.235*</b>  | -.087         | -.153         | -.021         | -.111         | -.009         | .048           | -.053         | -.120         | .090         | .094          | -.015        | -.002 | -.002 | -  |

\* $p < .05$  \*\* $p < .01$ .

1. I was concerned about my child's development.
2. I am concerned about my child's development.
3. My child's behaviors were easy to manage on a daily basis.
4. My child's behaviors are easy to manage on a daily basis.
5. I have time for myself.
6. I have access to information on COVID-19.
7. I integrated my personal interests into my routine.
8. I understand my child's needs.
9. I feel competent and able to help my child.
10. My child has an easy temperament.
11. My child is heading towards his interests.
12. My child is able to take care of himself.
13. My child is looking on information about COVID-19
14. Establishing a routine with my child.
15. Using my child's strengths.
16. The use of visual representations (image, pictogram, drawing, list) with my child.
17. Organizing my child's environment
18. Setting up learning activities with my child.
19. Setting up physical activities for my child.
20. My child attended emergency childcare service.

*Note.* This table demonstrates the associations between concerned about the child's development, ease of managing behaviors and facilitating factors (n=109).

**Table 3***Associations Between Being Concerned About the Child's Development, Child's Behaviors Are Easy to Manage on a Daily Basis and Facilitating Factors (part 2)*

|    | 1              | 2              | 3             | 4             | 5     | 6             | 7             | 8             | 9             | 10            | 11            | 12            | 13            | 14            | 15   | 16   | 17   | 18 |
|----|----------------|----------------|---------------|---------------|-------|---------------|---------------|---------------|---------------|---------------|---------------|---------------|---------------|---------------|------|------|------|----|
| 1  | -              |                |               |               |       |               |               |               |               |               |               |               |               |               |      |      |      |    |
| 2  | <b>.534**</b>  | -              |               |               |       |               |               |               |               |               |               |               |               |               |      |      |      |    |
| 3  | <b>-.322**</b> | <b>-.318**</b> | -             |               |       |               |               |               |               |               |               |               |               |               |      |      |      |    |
| 4  | <b>-.338**</b> | <b>-.503**</b> | <b>.519**</b> | -             |       |               |               |               |               |               |               |               |               |               |      |      |      |    |
| 5  | -.006          | -.020          | .091          | .064          | -     |               |               |               |               |               |               |               |               |               |      |      |      |    |
| 6  | .079           | .075           | -.116         | -.142         | -.081 | -             |               |               |               |               |               |               |               |               |      |      |      |    |
| 7  | <b>.268**</b>  | <b>.264**</b>  | -.072         | <b>-.204*</b> | .146  | <b>.259**</b> | -             |               |               |               |               |               |               |               |      |      |      |    |
| 8  | .066           | .027           | -.071         | -.118         | -.054 | .055          | .147          | -             |               |               |               |               |               |               |      |      |      |    |
| 9  | .153           | .084           | <b>-.240*</b> | <b>-.237*</b> | -.034 | <b>.241*</b>  | .151          | <b>.216*</b>  | -             |               |               |               |               |               |      |      |      |    |
| 10 | .159           | .174           | -.035         | -.092         | .103  | .147          | <b>.343**</b> | <b>.209*</b>  | .140          | -             |               |               |               |               |      |      |      |    |
| 11 | <b>.206*</b>   | <b>.209*</b>   | -.113         | <b>-.210*</b> | -.070 | <b>.286**</b> | <b>.482**</b> | <b>.268**</b> | <b>.296**</b> | <b>.626**</b> | -             |               |               |               |      |      |      |    |
| 12 | .101           | .043           | -.169         | -.168         | -.050 | .114          | .100          | .185          | .034          | .101          | .046          | -             |               |               |      |      |      |    |
| 13 | .119           | .035           | .004          | -.058         | -.124 | .151          | .099          | <b>.212*</b>  | .092          | .045          | .091          | .030          | -             |               |      |      |      |    |
| 14 | .052           | .062           | -.011         | -.079         | -.085 | .044          | <b>.300**</b> | .111          | -.017         | .020          | .165          | .085          | <b>.269**</b> | -             |      |      |      |    |
| 15 | .093           | .001           | -.164         | -.092         | -.090 | .035          | .022          | .036          | -.036         | .042          | .124          | .101          | <b>.235*</b>  | <b>.279**</b> | -    |      |      |    |
| 16 | .098           | -.037          | -.093         | .005          | -.122 | .013          | <b>.193*</b>  | .134          | -.023         | .138          | .184          | -.053         | .086          | <b>.361**</b> | .100 | -    |      |    |
| 17 | .127           | .054           | -.120         | -.111         | -.062 | <b>.196*</b>  | .058          | <b>.679**</b> | <b>.288**</b> | <b>.203*</b>  | <b>.247**</b> | <b>.259**</b> | <b>.251**</b> | .077          | .082 | .096 | -    |    |
| 18 | <b>.228*</b>   | <b>.257**</b>  | -.096         | -.116         | -.087 | <b>.254**</b> | <b>.247**</b> | -.073         | .154          | <b>.520**</b> | <b>.423**</b> | -.106         | .016          | .016          | .077 | .185 | .025 | -  |

\* $p < .05$  \*\* $p < .01$ .

1. I was concerned about my child's development.
2. I am concerned about my child's development.
3. My child's behaviors were easy to manage on a daily basis.
4. My child's behaviors are easy to manage on a daily basis.
5. My child having a job.
6. Access to electronic devices for my child.
7. Free time for my child.
8. Virtual contact with significant relatives.
9. Access to information about COVID-19.
10. Decrease in daily responsibilities towards academic demands.
11. The reduction of pressure related to academic performance.
12. Virtual contact with teachers.
13. Good communication between parents.
14. Setting up family activities.
15. Good relationships between children in the family
16. The possibility of spending time together
17. Virtual contact with family members.
18. The decrease in responsibilities in general.

*Note.* This table demonstrates the associations between being concerned about the child's development, ease of managing behaviors and facilitating factors (n=109).

**Table 4***Associations Between Being Concerned About the Child's Development, Child's Behaviors are Easy to Manage on a Daily Basis and Barriers*

|    | 1              | 2              | 3             | 4             | 5             | 6     | 7             | 8     | 9             | 10           | 11            | 12    | 13            | 14            | 15            | 16           | 17            | 18           | 19            | 20 |
|----|----------------|----------------|---------------|---------------|---------------|-------|---------------|-------|---------------|--------------|---------------|-------|---------------|---------------|---------------|--------------|---------------|--------------|---------------|----|
| 1  | -              |                |               |               |               |       |               |       |               |              |               |       |               |               |               |              |               |              |               |    |
| 2  | <b>.534**</b>  | -              |               |               |               |       |               |       |               |              |               |       |               |               |               |              |               |              |               |    |
| 3  | <b>-.322**</b> | <b>-.318**</b> | -             |               |               |       |               |       |               |              |               |       |               |               |               |              |               |              |               |    |
| 4  | <b>-.338**</b> | <b>-.503**</b> | <b>.519**</b> | -             |               |       |               |       |               |              |               |       |               |               |               |              |               |              |               |    |
| 5  | -.084          | -.098          | .042          | <b>.276**</b> | -             |       |               |       |               |              |               |       |               |               |               |              |               |              |               |    |
| 6  | <b>-.193*</b>  | -.041          | .007          | .130          | .188          | -     |               |       |               |              |               |       |               |               |               |              |               |              |               |    |
| 7  | -.172          | -.164          | -.098         | <b>.203*</b>  | -.030         | .066  | -             |       |               |              |               |       |               |               |               |              |               |              |               |    |
| 8  | -.152          | -.130          | .051          | .006          | .044          | -.178 | <b>-.213*</b> | -     |               |              |               |       |               |               |               |              |               |              |               |    |
| 9  | -.063          | -.052          | -.172         | -.079         | .135          | -.125 | -.034         | .137  | -             |              |               |       |               |               |               |              |               |              |               |    |
| 10 | -.163          | -.187          | .037          | .005          | <b>.239*</b>  | .021  | -.071         | .160  | <b>.329**</b> | -            |               |       |               |               |               |              |               |              |               |    |
| 11 | .135           | -.134          | -.057         | .075          | .008          | -.021 | .115          | .083  | .046          | <b>.199*</b> | -             |       |               |               |               |              |               |              |               |    |
| 12 | -.007          | .133           | -.044         | .012          | .146          | .165  | <b>.317**</b> | -.188 | .001          | -.130        | -.082         | -     |               |               |               |              |               |              |               |    |
| 13 | <b>-.417**</b> | <b>-.462**</b> | <b>.264**</b> | <b>.333**</b> | .164          | .060  | .072          | .058  | .153          | .056         | .032          | -.047 | -             |               |               |              |               |              |               |    |
| 14 | -.187          | <b>-.326**</b> | <b>.263**</b> | <b>.276**</b> | .142          | .047  | .046          | .158  | .090          | .062         | .134          | -.145 | <b>.435**</b> | -             |               |              |               |              |               |    |
| 15 | -.069          | -.144          | <b>-.199*</b> | .035          | <b>.340**</b> | .090  | .131          | -.040 | <b>.287**</b> | .175         | -.087         | .222* | .180          | .060          | -             |              |               |              |               |    |
| 16 | -.178          | <b>-.292**</b> | .180          | <b>.261**</b> | .029          | .144  | .139          | .111  | -.079         | -.053        | .096          | .073  | <b>.361**</b> | <b>.514**</b> | .117          | -            |               |              |               |    |
| 17 | <b>-.436**</b> | <b>-.434**</b> | <b>.222*</b>  | <b>.241*</b>  | .168          | .016  | .159          | .061  | .078          | .080         | .129          | -.006 | <b>.324**</b> | .139          | .182          | <b>.203*</b> | -             |              |               |    |
| 18 | -.162          | -.108          | .096          | .092          | .182          | .075  | -.066         | .178  | .162          | .090         | <b>.254**</b> | .015  | <b>.236*</b>  | <b>.355**</b> | <b>.226*</b>  | <b>.203*</b> | <b>.282**</b> | -            |               |    |
| 19 | .042           | .056           | -.154         | -.080         | .029          | .104  | .038          | .065  | .010          | <b>.209*</b> | -.130         | .008  | -.100         | -.118         | .158          | -.012        | -.024         | .117         | -             |    |
| 20 | -.080          | -.033          | -.002         | .056          | .186          | .032  | -.102         | .154  | .170          | .175         | .044          | .004  | <b>.209*</b>  | .112          | <b>.274**</b> | .062         | .049          | <b>.191*</b> | <b>.254**</b> | -  |

\* $p < .05$  \*\* $p < .01$ .

1. I was concerned about my child's development.
2. Have concerned about my child's development.
3. My child's behaviors were easy to manage on a daily basis.
4. My child's behaviors are easy to manage on a daily basis.
5. My child has no more routine.
6. My child has late and / or disturbed sleep.
7. My child attends emergency childcare service.
8. My child is moving more towards his particular interests.
9. My child has too much free time.
10. My child has access to electronic devices.

11. My child has access to information about COVID-19.
12. I work in essential services several hours a week.
13. I feel helpless facing my child's needs
14. I need support to overcome some personal vulnerabilities.
15. I cannot give my child enough time.
16. I need to be better informed and better equipped.
17. We avoid going outside.
18. We are more isolated from our loved ones.
19. It is necessary to pursue academic goals at a distance.
20. There is a decrease in interventions by school persone

Note. This table demonstrates the associations between concerned about the child's development, ease of managing behaviors and barriers (n=109).

**Table 5***Top 3 Facilitating Factors by Age Groups***Prescolar (6 years and less) (N=10)**

|                                                              | <i>n</i> | %   |
|--------------------------------------------------------------|----------|-----|
| <b>Personal facilitators</b>                                 |          |     |
| I understand my child's needs                                | 7        | 70  |
| I feel competent and able to help my child                   | 5        | 50  |
| I have access to information on COVID-19                     | 3        | 30  |
| <b>Environmental facilitators</b>                            |          |     |
| The use of visual representations (images, pictograms, etc.) | 7        | 70  |
| Establishing a routine with my child                         | 6        | 60  |
| Using my child's strength                                    | 5        | 50  |
| Setting up physical activities for my child                  | 5        | 50  |
| <b>Family facilitators</b>                                   |          |     |
| Good communication between parents                           | 10       | 100 |
| The possibility of having time spent together                | 7        | 70  |
| Good understanding between the children of the family        | 6        | 60  |

**Scolar (6 years to 12 years) (N=63)**

|                                                             |    |       |
|-------------------------------------------------------------|----|-------|
| <b>Personal facilitators</b>                                |    |       |
| I understand my child's needs                               | 47 | 74,60 |
| My child is able to take care of himself                    | 30 | 47,62 |
| I feel competent and able to help my child                  | 25 | 39,68 |
| <b>Environmental facilitators</b>                           |    |       |
| Establishing a routine with my child                        | 46 | 73,02 |
| Decrease in daily responsibilities towards academic demands | 34 | 53,97 |
| Setting up learning activities with my child                | 28 | 44,44 |
| Using my children's strength                                | 28 | 44,44 |
| <b>Family facilitators</b>                                  |    |       |
| The possibility of having time spent together               | 41 | 65,08 |
| Good communication between parents                          | 38 | 60,32 |
| The establishment of family activities                      | 32 | 50,79 |

---

**High school (13 years and more) (N=37)****Personal facilitators**

|                                           |    |       |
|-------------------------------------------|----|-------|
| I understand my child's needs             | 26 | 70,27 |
| My child is able to take care of himself  | 25 | 67,57 |
| My child is heading towards his interests | 17 | 45,95 |

**Environmental facilitators**

|                                                             |    |       |
|-------------------------------------------------------------|----|-------|
| Establishing a routine with my child                        | 22 | 59,46 |
| Access to electronic devices for my child                   | 18 | 48,65 |
| Decrease in daily responsibilities towards academic demands | 17 | 45,95 |

**Family facilitators**

|                                               |    |       |
|-----------------------------------------------|----|-------|
| Good communication between parents            | 21 | 56,76 |
| The possibility of having time spent together | 20 | 54,05 |
| The reduction of responsibilities in general  | 18 | 48,65 |

---

*Note.* This table demonstrates the top 3 facilitating factors during the pandemic by age group, as endorsed by the respondents (n=109) in multiple-choice questions. The respondents could select all the answers that they thought had a positive impact on their capacity to cope with the pandemic.

**Table 6**  
*Facilitating Factors*

|                                                                                   | <i>n</i> | %     |
|-----------------------------------------------------------------------------------|----------|-------|
| <b>Personal facilitators</b>                                                      |          |       |
| I have time for myself                                                            | 21       | 19.27 |
| I have access to information on COVID-19                                          | 37       | 33.94 |
| I integrated my personal interests into my routine                                | 23       | 21.10 |
| I understand my child's needs                                                     | 80       | 73.39 |
| I feel competent and able to help my child                                        | 43       | 33.45 |
| My child has an easy temperament                                                  | 33       | 30.28 |
| My child is heading towards his interests                                         | 39       | 35.78 |
| My child is able to take care of himself                                          | 57       | 52.29 |
| My child is looking for information about COVID-19                                | 10       | 9.17  |
| <b>Environmental facilitators</b>                                                 |          |       |
| Establishing a routine with my child                                              | 73       | 66.97 |
| Use of my child's strengths                                                       | 44       | 40.37 |
| The use of visual representations (image, pictogram, drawing, list) with my child | 43       | 39.45 |
| Organizing my child's environment                                                 | 41       | 37.61 |
| Setting up learning activities with my child                                      | 37       | 33.94 |
| Setting up physical activities for my child                                       | 37       | 33.94 |
| My child attended emergency child care                                            | 3        | 2.75  |
| My child having a job                                                             | 1        | 0.92  |
| Access to electronic devices for my child                                         | 45       | 41.28 |
| Free time for my child                                                            | 33       | 30.28 |
| Virtual contact with significant relatives                                        | 26       | 23.85 |
| Access to information about COVID-19                                              | 12       | 11.01 |
| Decrease in daily responsibilities towards academic requirements                  | 51       | 46.79 |
| The reduction of pressure related to academic performance                         | 38       | 34.86 |
| Virtual contact with teachers                                                     | 23       | 21.10 |
| <b>Family facilitators</b>                                                        |          |       |
| Good communication between parents                                                | 68       | 62.39 |
| Setting up family activities                                                      | 48       | 44.04 |
| Good relationships between children in the family                                 | 51       | 46.79 |
| The possibility of spending time together                                         | 67       | 61.47 |
| Virtual contact with family members                                               | 32       | 29.36 |
| The reduction of responsibilities in general                                      | 49       | 44.95 |

*Note.* This table demonstrates the facilitating factors during the pandemic, as endorsed by the respondents (n=109) in multiple-choice questions. The respondents could select all the answers that they thought had a positive impact on their capacity to cope with the pandemic.



**Table 7**  
*Top 3 Barriers by Age Groups*

| <b>Prescolar (6 years and less)</b>                      | <b><i>n</i></b> | <b>%</b> |
|----------------------------------------------------------|-----------------|----------|
| We are more isolated from our loved ones                 | 6               | 60       |
| My child has late and / or disturbed sleep               | 5               | 50       |
| We avoid going outside                                   | 5               | 50       |
| <hr/>                                                    |                 |          |
| <b>Scolar (6 years to 12 years)</b>                      |                 |          |
| My child has access to electronic devices                | 42              | 66,7     |
| We are more isolated from our loved ones                 | 40              | 63,49    |
| It is necessary to pursue academic goals at a distance   | 36              | 57,14    |
| <hr/>                                                    |                 |          |
| <b>Highschool (13 years and more)</b>                    |                 |          |
| It is necessary to pursue academic goals at a distance   | 19              | 51,35    |
| My child has access to electronic devices                | 18              | 48,65    |
| There is a decrease in interventions by school staff     | 17              | 45,95    |
| My child is moving more towards his particular interests | 17              | 45,95    |
| <hr/>                                                    |                 |          |

*Note.* This table demonstrates the top 3 barriers during the pandemic by age group, as endorsed by the respondents (n=109) in multiple-choice questions. The respondents could select all the answers that they thought had a negative impact on their capacity to cope with the pandemic.

**Table 8**  
*Barriers*

| <b>Barriers</b>                                           | <b><i>n</i></b> | <b>%</b> |
|-----------------------------------------------------------|-----------------|----------|
| My child has no more routine                              | 51              | 46.79    |
| My child has late and / or disturbed sleep                | 49              | 44.95    |
| My child attends emergency childcare service              | 5               | 4.59     |
| My child works outside                                    | 0               | 0        |
| My child is moving more towards his particular interests. | 53              | 48.62    |
| My child has too much free time                           | 52              | 47.71    |
| My child has access to electronic devices                 | 61              | 55.96    |
| My child has access to information about COVID-19         | 21              | 19.27    |
| I work in essential services several hours a week         | 23              | 21.11    |
| I feel helpless facing my child's needs                   | 28              | 25.69    |
| I need support to overcome some personal vulnerabilities  | 33              | 30.28    |
| I cannot give my child enough time                        | 35              | 32.11    |
| I need to be better informed and better equipped          | 18              | 16.51    |
| We avoid going outside                                    | 48              | 44.04    |
| We are more isolated from our loved ones                  | 60              | 55.05    |
| It is necessary to pursue academic goals at a distance    | 56              | 51.38    |
| There is a decrease in interventions by school personnel  | 47              | 43.12    |

*Note.* This table demonstrates the barriers during the pandemic, as endorsed by the respondents (n=109) in multiple-choice questions. The respondents could select all the answers that they thought had a negative impact on their capacity to cope with the pandemic. \*Essential services mean services considered a priority, which remained open during the pandemic and which require an in-person presence.
